# Supplementary material for: Application of fuzzy c-means clustering for analysis of chemical ionization mass spectra: insights into the gas-phase chemistry of NO 3 -initiated oxidation of isoprene
Source: Copernicus journal article supplement (doi:10.5194/egusphere-2023-1896), 2023-08-30
Supplement: Supplementary file 1 [file egusphere-2023-1896-supplement.pdf]

## S1 Fuzzy clustering validity indices

Six fuzzy validity indices were used to determine the appropriate number of clusters, include Sum of within-cluster variance ( $V_{SWCV}$ ), Fukuyama-Sugeno index ( $V_{FS}$ , Fukuyama, 1989), Xie-Beni index ( $V_{XB}$ , Xie and Beni, 1991), Kwon index ( $V_{Kwon}$ , Kwon, 1998), Bouguessa-Wang-Sun index ( $V_{BWS}$ , Bouguessa et al., 2006), and Fuzzy Silhouette ( $FS$ , Campello and Hruschka, 2006). Their definitions and notes for applications are described in this section.

**(1) Sum of within-cluster variation ( $V_{SWCV}$ ).** The basic idea of clustering is to sort clusters so that the sum of within-cluster variation is minimized, and this is used as the objective function  $J_m(U, V)$  in fuzzy  $c$ -means clustering, as given by Eq. S1. The sum of within-cluster squared distance measures the compactness of clustering, and the “knee” in the curve of  $V_{SWCV}$  as a function of numbers of clusters is generally considered as an indicator of the optimal number of clusters (Campello and Hruschka, 2006).

$$V_{SWCV} = \sum_{i=1}^c \sum_{j=1}^n u_{ij}^m \|x_j - v_i\|^2 \quad (S1)$$

where  $x_j$  and  $v_i$  denote the  $j^{th}$  object in the dataset and the  $i^{th}$  cluster center, respectively,  $m$  is the fuzzifier, and  $u_{ij}$  is the membership degree of  $x_j$  to the  $i^{th}$  cluster.

**(2) Fukuyama-Sugeno index ( $V_{FS}$ ).** The Fukuyama-Sugeno index combines the membership degree and the geometrical property of the dataset to evaluate a partition (Bouguessa and Wang, 2004). It evaluates the quality of a clustering solution by measuring the discrepancy between compactness and separation of clusters. The mathematical expression of  $V_{FS}$  is shown in Eq. S2, where the sum of within-cluster variances, as the first item in the equation, represents compactness, while the sum of squared distances between each cluster center and the mean of all cluster centers, as the second item in the equation, measures the separation of partition. Obviously, smaller  $V_{FS}$  indicates better performance of clustering.

$$V_{FS} = \sum_{i=1}^c \sum_{j=1}^n u_{ij}^m \|x_j - v_i\|^2 - \sum_{i=1}^c (\sum_{j=1}^n u_{ij}^m) \|v_i - \bar{v}\|^2 \quad (S2)$$

where  $\bar{v} = \frac{1}{c} \sum_{i=1}^c v_i$ .

Identically,  $x_j$  and  $v_i$  denote the  $j^{th}$  object in the dataset and the  $i^{th}$  cluster center, respectively,  $m$  is the fuzzifier, and  $u_{ij}$  is the membership degree of  $x_j$  to the  $i^{th}$  cluster.

**(3) Xie-Beni index ( $V_{XB}$ ).** Xie-Beni index is a popular fuzzy clustering validity measure proposed by Xie and Beni (1991). It is defined as the ratio of compactness and separation as shown in Eq. S3, where the sum of within-cluster squared distance which is equivalent to the objective function  $J_m(U, V)$ , divided by the total number of objects in the numerator, is the compactness of the partition, and the minimum squared distance of cluster centers in the denominator is represents the separation. The smaller the numerator, the more compact is a cluster, whereas the larger the denominator, the more a cluster is separated. As a consequence, the smaller  $V_{XB}$ , the better the partition.

$$V_{XB} = \frac{\frac{1}{n} \sum_{i=1}^c \sum_{j=1}^n u_{ij}^m \|x_j - v_i\|^2}{\min_{k \neq i} \|v_k - v_i\|^2} \quad (S3)$$

where  $x_j$ ,  $v_i$  and  $v_k$  denote the  $j^{th}$  object in the dataset, the  $i^{th}$  and  $k^{th}$  cluster center, respectively,  $m$  is the fuzzifier, and  $u_{ij}$  is the membership degree of  $x_j$  to the  $i^{th}$  cluster.

**(4) Kwon index ( $V_{kwon}$ ).** When  $c$  approaches  $n$ , the value of  $V_{XB}$  decreases monotonically to 0 and will lose robustness in determining the optimal number of clusters. To overcome this drawback, Kwon (1998) revised  $V_{XB}$  and proposed Kwon index, as defined in Eq. S4. The second item in the numerator is a punishing function, which represents the average squared distance of cluster centers to the overall mean of the data set and can eliminate its monotonous decreasing tendency when the number of clusters is close to  $n$ . Similar to  $V_{XB}$ , the smaller  $V_{kwon}$ , the better the clustering quality.

$$V_K = \frac{\sum_{i=1}^c \sum_{j=1}^n u_{ij}^m \|x_j - v_i\|^2 + (1/c) \sum_{i=1}^c \|v_i - \bar{x}\|^2}{\min_{k \neq i} \|v_k - v_i\|^2} \quad (S4)$$

where  $\bar{x} = \frac{1}{n} \sum_{j=1}^n x_j$ .

Identically,  $x_j$ ,  $v_i$  and  $v_k$  in the formula denote the  $j^{th}$  object in the dataset, the  $i^{th}$  and  $k^{th}$  cluster center, respectively,  $m$  is the fuzzifier, and  $u_{ij}$  is the membership degree of  $x_j$  to the  $i^{th}$  cluster.

**(5) Bouguessa-Wang-Sun index ( $V_{BWS}$ ).** To better deal with overlapped clusters that differ in geometric shape, Bouguessa et al. (2006) proposed a new validity index, as formulated in Eq. S5, and hereafter called Bouguessa-Wang-Sun index in this study. Similar to  $V_{XB}$  and  $V_{kwon}$ ,  $V_{BWS}$  is also based on the concept of using the ratio of compactness and separation, but the definitions for

compactness and separation are modified. By making use of the fuzzy covariance matrix as a measure of compactness,  $V_{BWS}$  takes the variations of cluster shape, density and orientation into account and was proved to perform well for heavily overlapping clusters (Bouguessa and Wang, 2004; Bouguessa et al., 2006). According to its definition, a larger value of  $V_{BWS}$  indicates a better fuzzy partition.

$$V_{BWS} = \frac{Sep(c)}{Comp(c)} \quad (S5)$$

In the equation,  $Sep(c)$  represents fuzzy separation, as defined in Eq. S6, and  $S_B$  is the between-cluster fuzzy matrix given by Eq. S7. The larger  $Sep(c)$ , the better separation between clusters.

$$Sep(c) = trace(S_B) \quad (S6)$$

$$S_B = \sum_{i=1}^c \sum_{j=1}^n u_{ij}^m (v_i - \bar{v})(v_i - \bar{v})^T \quad (S7)$$

$Comp(c)$  in Eq. S5 represents the overall compactness of fuzzy clustering, as given by Eq. S8. The smaller  $Comp(c)$ , the more compact within each cluster.

$$Comp(c) = \sum_{i=1}^c trace(\Sigma_i) \quad (S8)$$

where  $\Sigma_i$  is the fuzzy covariance matrix as defined by:

$$\Sigma_i = \frac{\sum_{j=1}^n u_{ij}^m (x_j - v_i)(x_j - v_i)^T}{\sum_{j=1}^n u_{ij}^m} \quad (S9)$$

**(6) Fuzzy Silhouette (FS).** The silhouette score ( $s_j$ , as defined in Eq. S10) was first proposed by Rousseeuw (1987), which can be used to measure how close an object is to the cluster center it belongs compared to other clusters. The average silhouette score of all objects,  $CS$ , as given by Eq. S11, are frequently used to assess the quality of clustering solutions. The silhouette score was originally adopted to evaluate hard or non-fuzzy clustering solutions and did not consider the fuzzy partition matrix in the calculation. Consequently,  $CS$  might be inadequate to discriminate fuzzy clusters since it ignores the information contained in the fuzzy partition matrix which reveal the overlap degrees of clusters. To extend the silhouette score to fuzzy partition and make explicit use of the fuzzy partition matrix, Campello and Hruschka (2006) proposed *Fuzzy Silhouette (FS)*, as given by Eq. S12. Instead of weighing each individual silhouette equally, *FS* stresses the importance of objects lying in the vicinity of cluster centers

while reducing the importance of objects located in the boundary region (whose membership degrees to different clusters are similar or identical).

The silhouette score falls in the range from -1 to +1, with a value approaching +1 indicating that the object is correctly assigned, whereas with a value close to -1 indicating that the object is misclustered (better to sort it to a neighboring cluster than to current cluster). An  $s_j$  close to 0 implies that the object lies in the boundary region (between clusters) and thus it's unclear to which cluster it belongs. The average cluster silhouette score can tell if the cluster is appropriately configured or not. The larger the average cluster silhouette score, the clearer the cluster. The overall average silhouette score of all objects in the dataset can be used as a measure of clustering quality. Further, it can be used to find the appropriate number of clusters. With different cluster numbers, the maximum overall silhouette score, which means minimizing the intra-cluster distance ( $a_{pj}$ ) while maximizing the inter-cluster distance ( $b_{pj}$ ), indicates the optimal number of clusters.

$$S_j = \frac{b_{pj} - a_{pj}}{\max\{a_{pj}, b_{pj}\}} \quad (\text{S10})$$

where  $a_{pj}$  is the average distance of object  $j$  (belonging to cluster  $p$ ) to all other objects in the same cluster. Let  $d_{qj}$  be the average distance of object  $j$  to all objects belonging to another cluster  $q$  ( $q \neq p$ ), then  $b_{pj}$  is the minimum  $d_{qj}$ , which represents the average distance of object  $j$  to its closet neighboring cluster.

$$CS = \frac{1}{n} \sum_{j=1}^n S_j \quad (\text{S11})$$

$$FS = \frac{\sum_{j=1}^n (u_{pj} - u_{qj})^\alpha S_j}{\sum_{j=1}^n (u_{pj} - u_{qj})^\alpha} \quad (\text{S12})$$

where  $s_j$  in the average silhouette score of object  $j$  calculated according to Eq. S10,  $u_{pj}$  and  $u_{qj}$  are the first and second largest coefficient in column  $j$  of the fuzzy partition matrix, respectively, and  $\alpha$  is a weight coefficient and set to be 1 as default in this study (Campello and Hruschka, 2006).



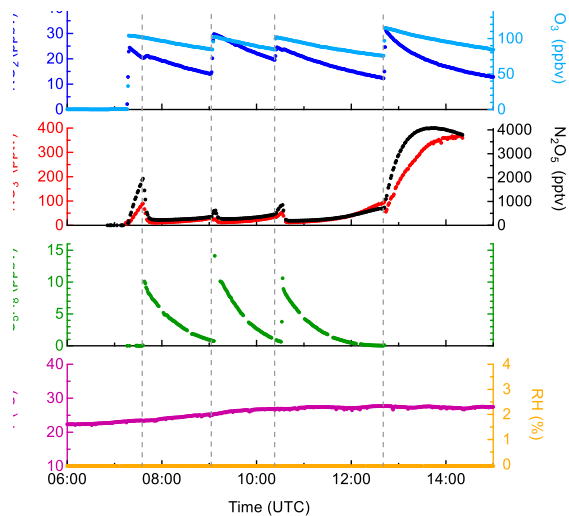

**Figure S1.** Concentrations of trace gases (NO<sub>x</sub>, NO<sub>y</sub>, and isoprene) and conditions of the chamber experiment selected for FCM analysis in this study. Adapted from Wu et al. (2021).

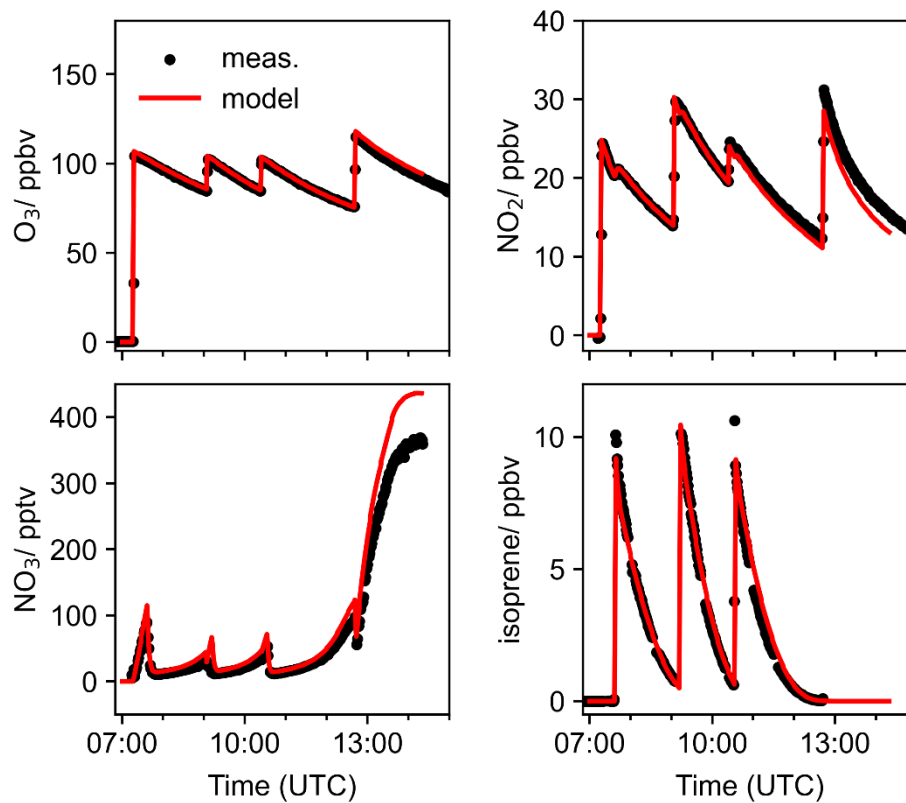

**Figure S2.** Measured and simulated concentrations of O<sub>3</sub>, NO<sub>2</sub>, NO<sub>3</sub>, and isoprene in the chamber experiment of isoprene oxidation by NO<sub>3</sub>. Simulation results are from a box model with using the gas-phase chemistry mechanism of isoprene + NO<sub>3</sub> from MCM v3.3.1.

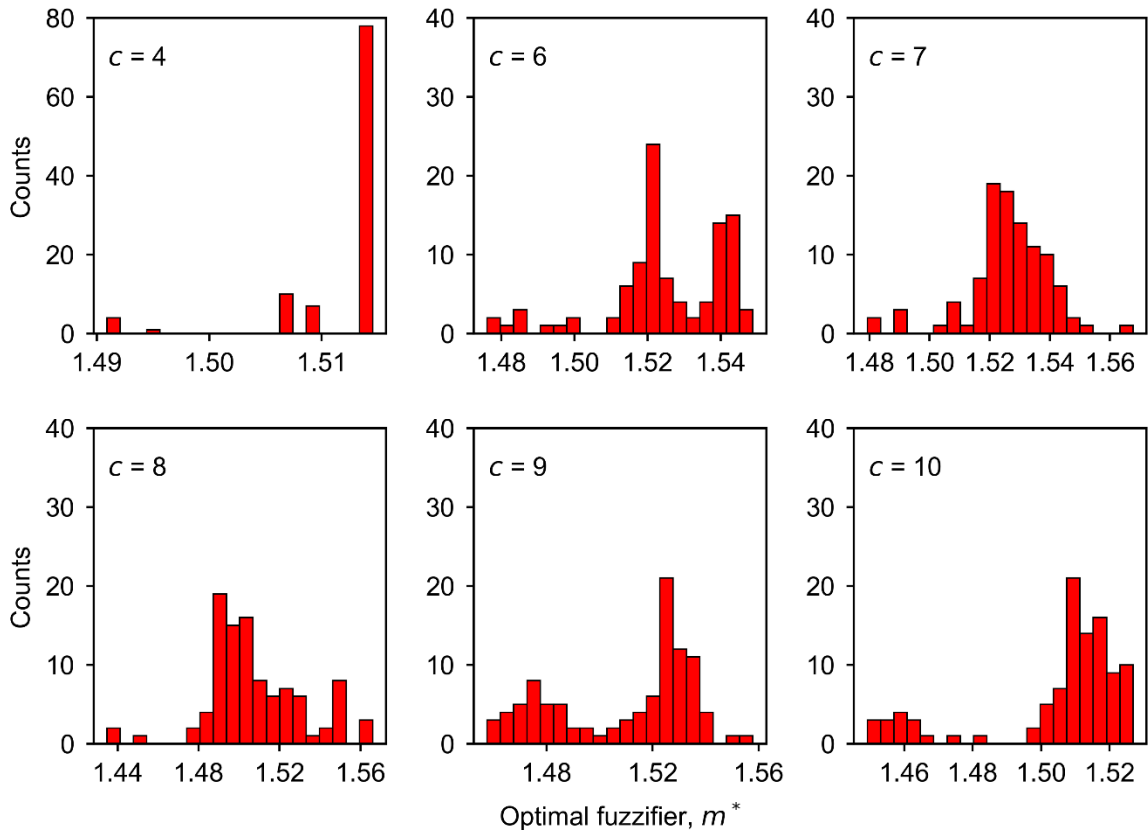

**Figure S3.** Distribution of the optimal value of fuzzifier ( $m^*$ ) obtained from 100 repetitions



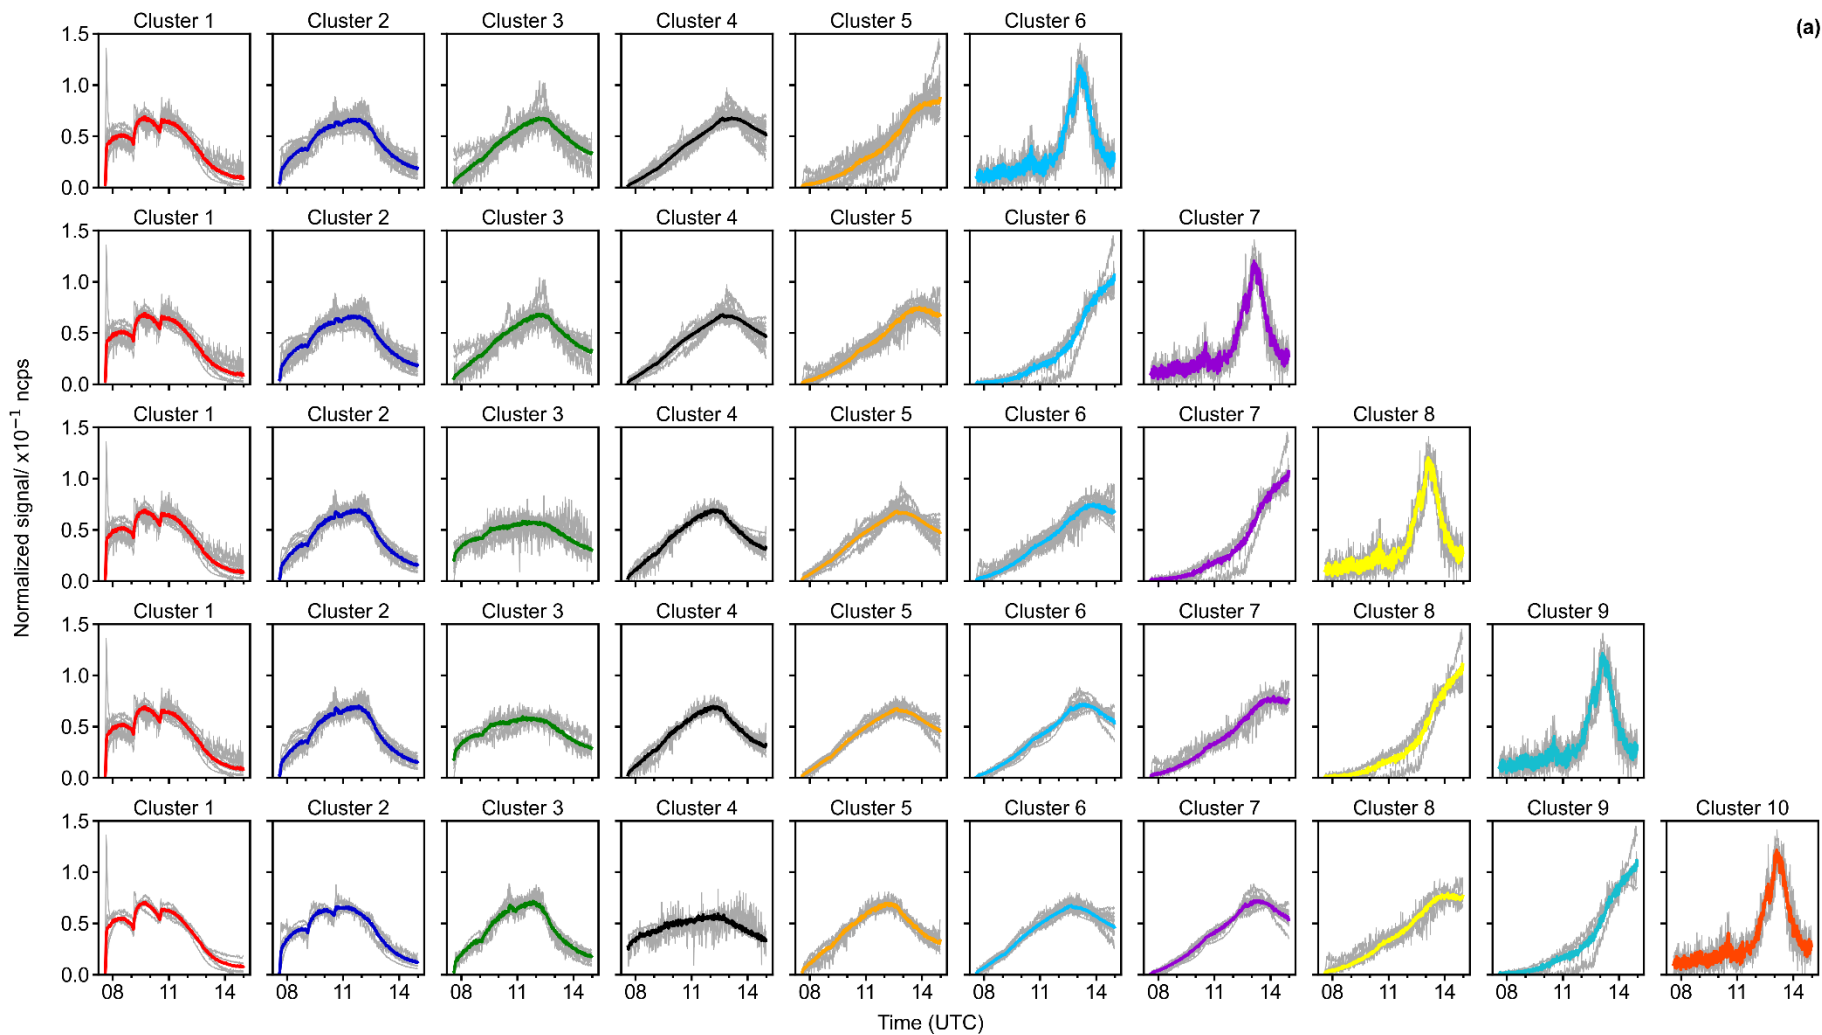

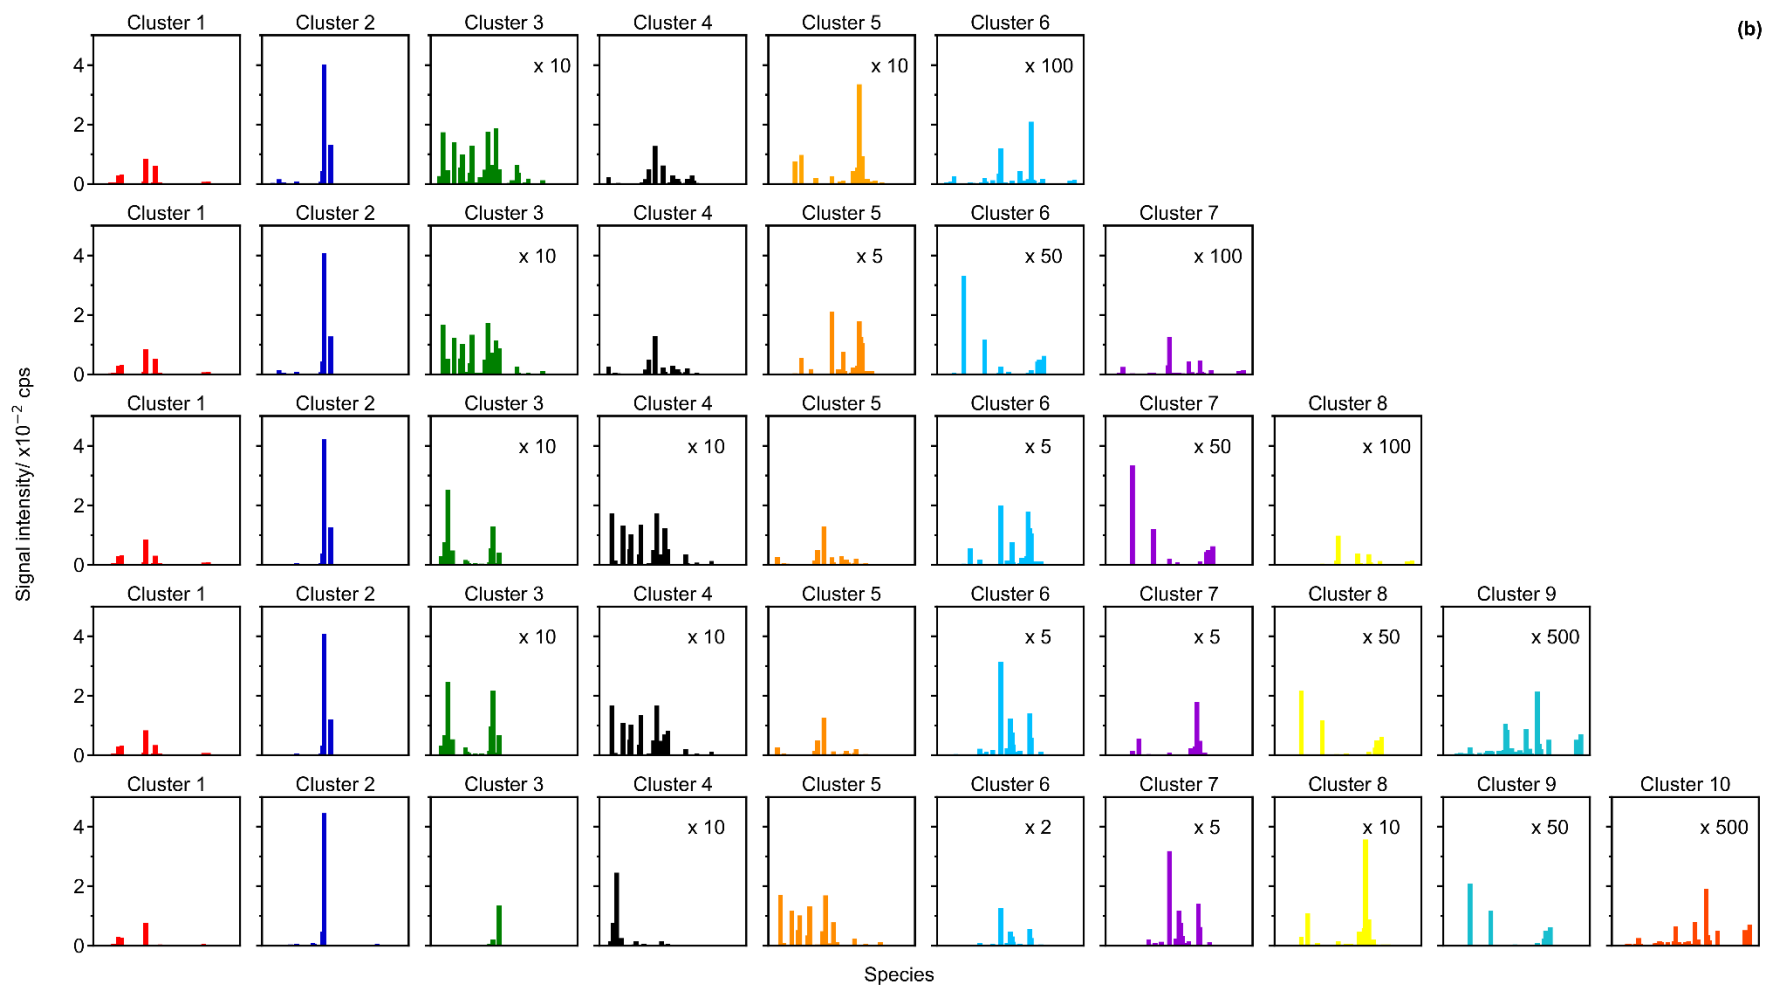

**Figure S4.** Fuzzy c-means clustering results of chamber data with 7-10 clusters. Time series (a) and profiles (b) of clusters for each solution. The cluster centers are shown as colored thick lines, and species with the membership degree larger than 0.5 to the cluster are illustrated as thin lines in gray.

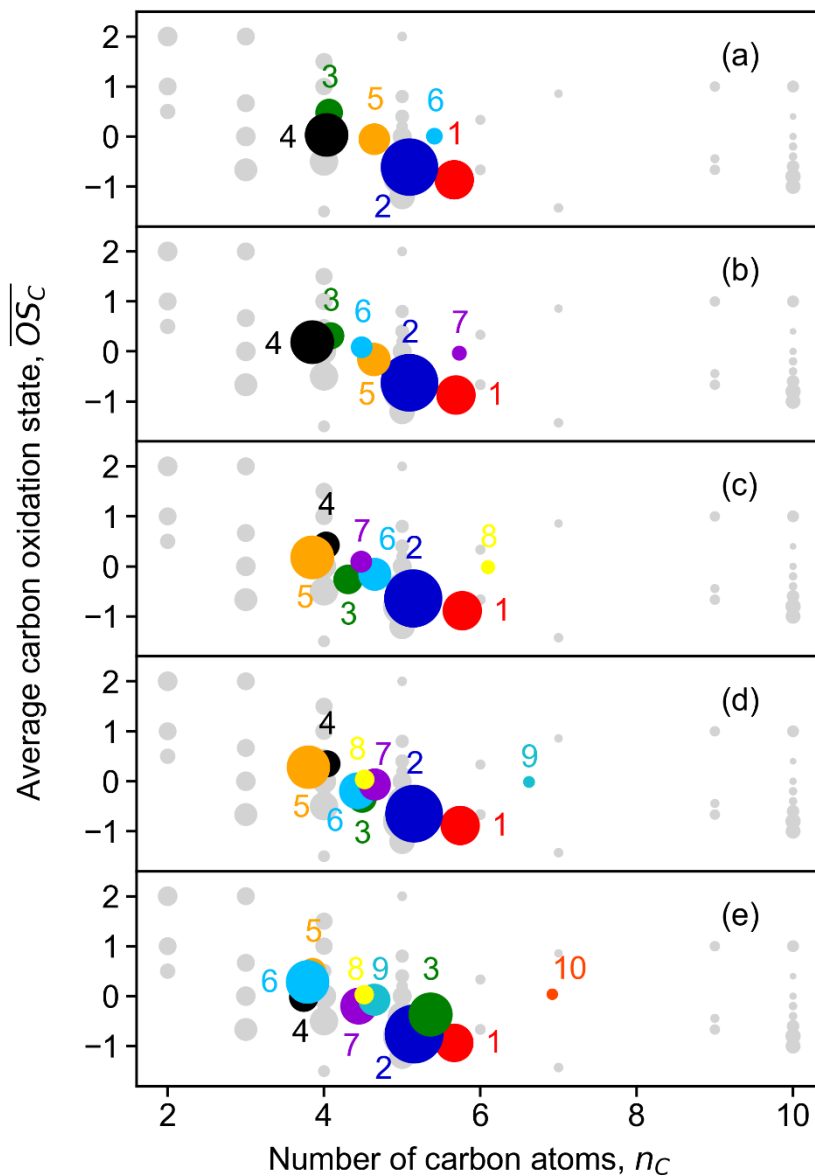

**Figure S5.** Average oxidation state ( $\overline{OS}_C$ ) of FCM clusters of chamber data as a function of number of carbon atoms ( $n_C$ ). Panel (a) to panel (e) show results for solutions with 6 to 10 clusters, respectively. The color scheme follows that in Fig. 4. Individual species are shown as grey circles. Marker size is proportional to the square root of the average intensity of clusters.

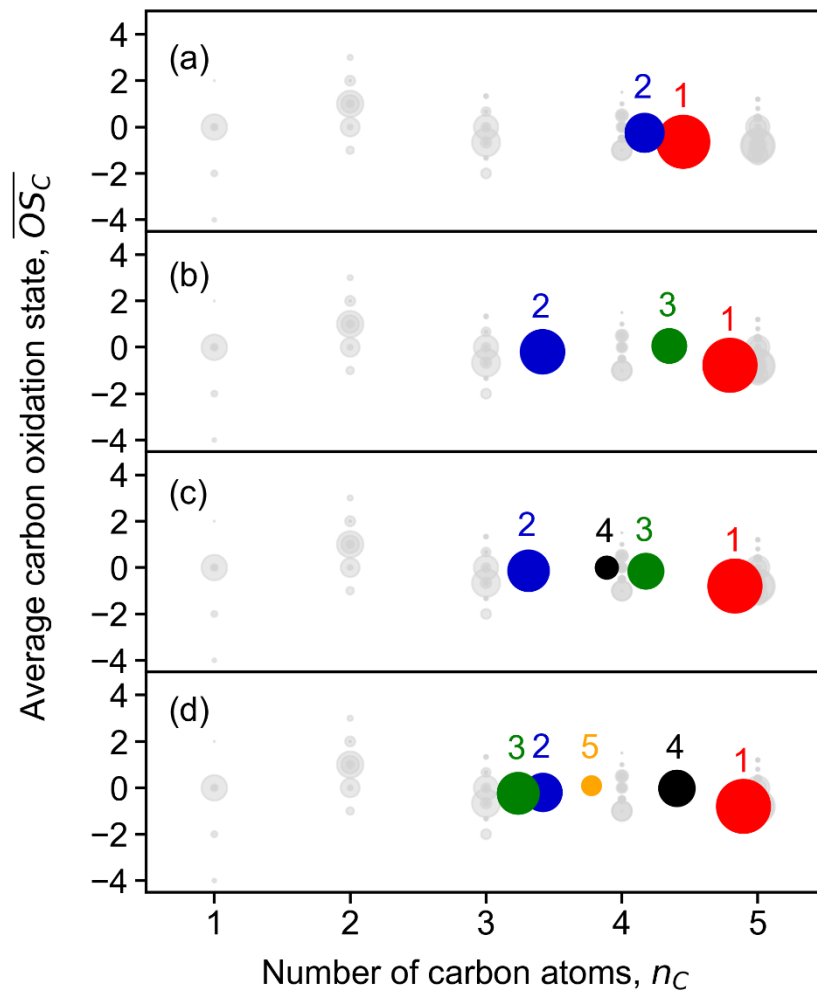

**Figure S6.** Average oxidation state ( $\overline{OS}_C$ ) of FCM clusters of model data as a function of number of carbon atoms ( $n_C$ ). Panel (a) to panel (d) show results for solutions with 2 to 5 clusters, respectively. The color scheme follows that in Fig. 4. Individual species are shown as grey circles. Marker size is proportional to the square root of the average intensity of clusters.

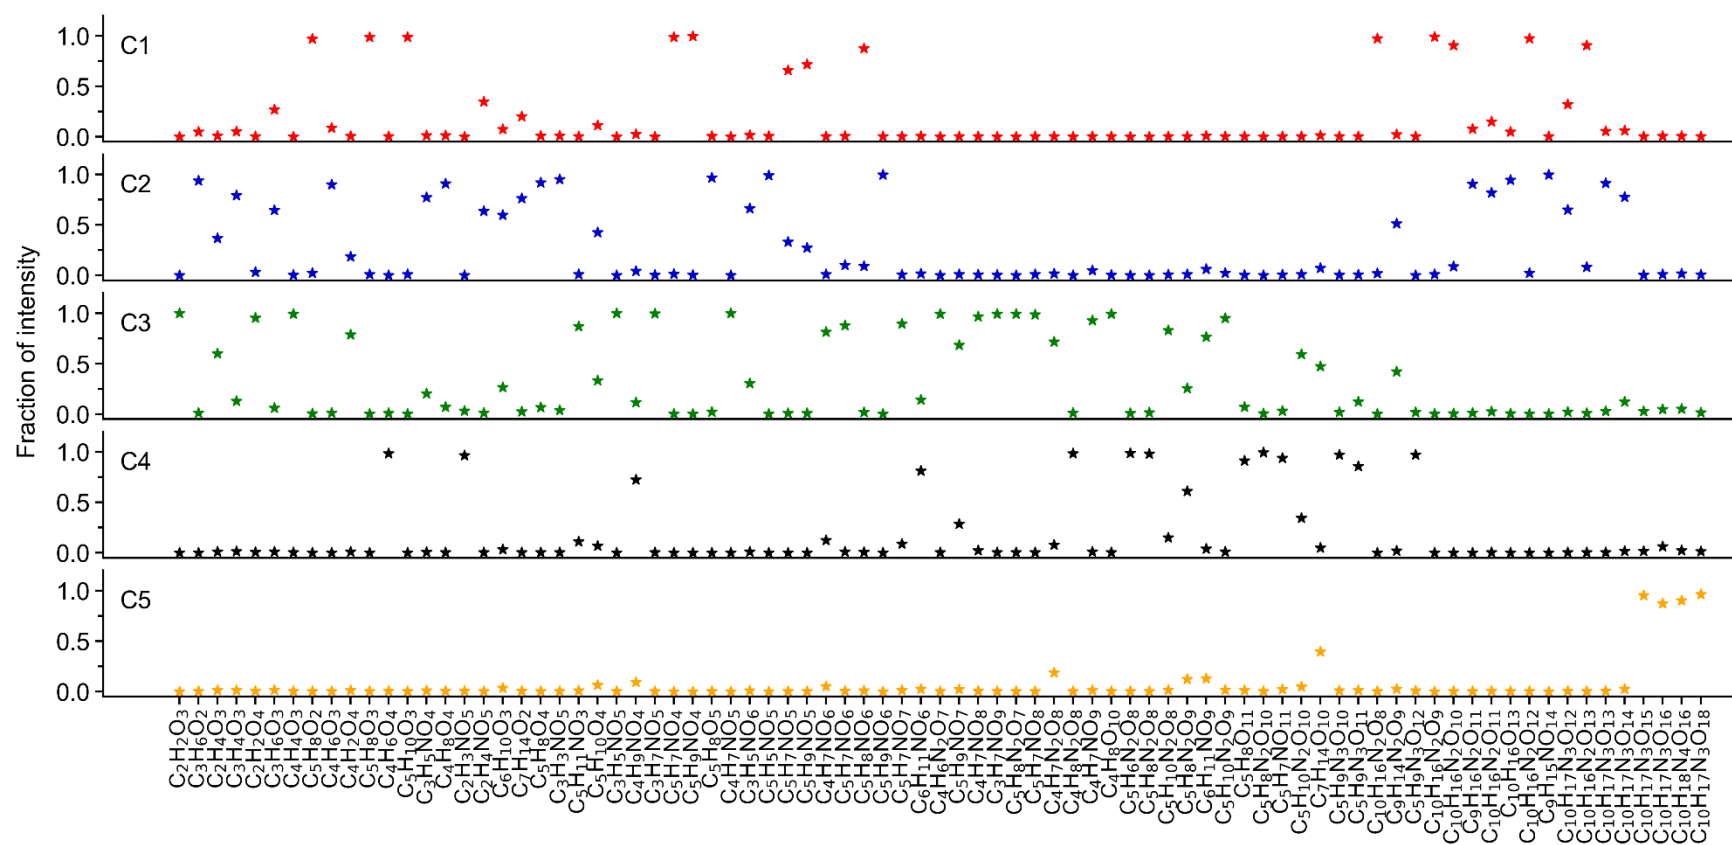

**Figure S7.** Cluster apportionment of species for the five-cluster solution. Sum of fractions of a compound in each cluster adds up to 1. Different clusters are distinguished by color, and the color scheme follows that in Fig. 4. Species are listed in the same order to those in Fig. 7.

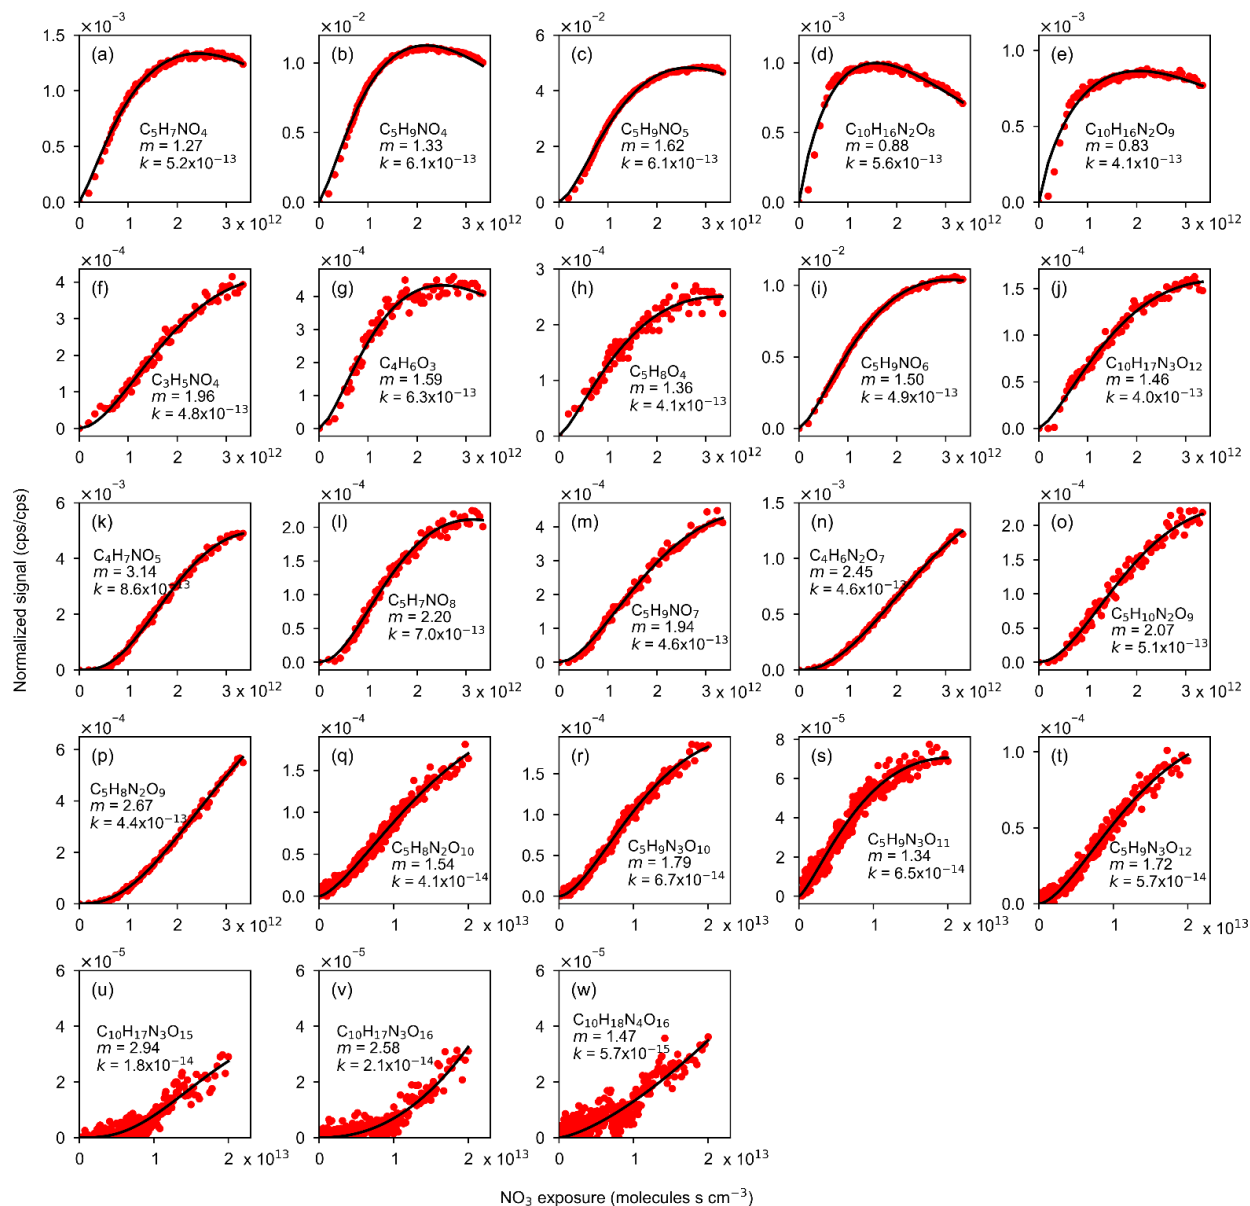

**Figure S8.** Representative species measured by  $\text{Br}^-$ -CIMS from isoprene +  $\text{NO}_3$  experiment (red) and the GKP fitting results (black).

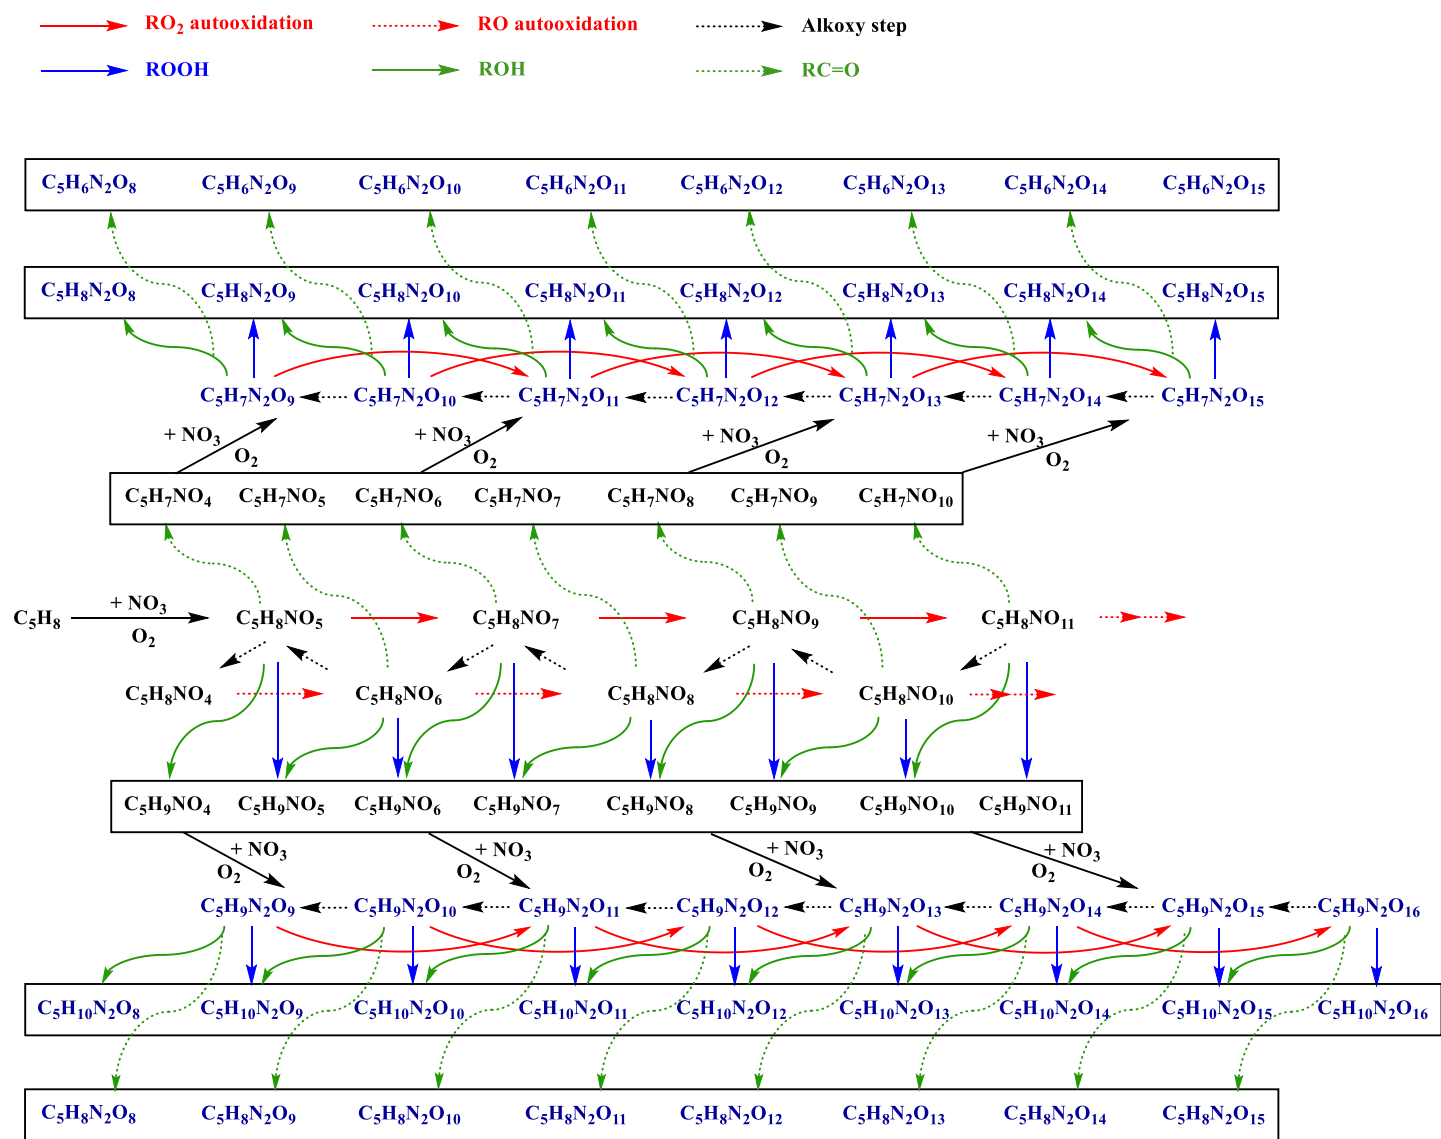

**Scheme S1.** General reaction scheme of isoprene oxidation by NO<sub>3</sub>. The first- and second-generation products are shown in black and blue, respectively. Closed-shell species are outlined in black boxes. Dimers are not shown in this scheme for simplicity.

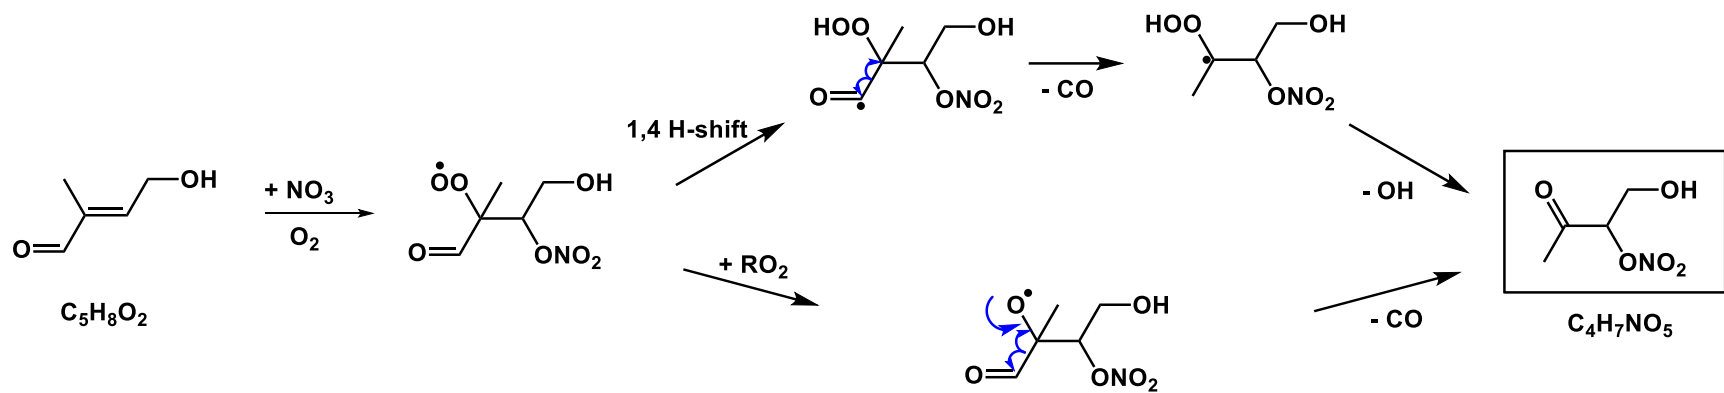

**Scheme S2.** Proposed formation mechanism of  $C_4H_7NO_5$  through further oxidation of the first-generation  $C_5$  carbonyl compound. Adapted from Wu et al. (2021).



## References

- Bouguessa, M. and Wang, S.-R.: A new efficient validity index for fuzzy clustering, Proceedings of 2004 International Conference on Machine Learning and Cybernetics (IEEE Cat. No. 04EX826), 1914-1919,
- Bouguessa, M., Wang, S., and Sun, H.: An objective approach to cluster validation, Pattern Recognition Letters, 27, 1419-1430, 10.1016/j.patrec.2006.01.015, 2006.
- Campello, R. J. G. B. and Hruschka, E. R.: A fuzzy extension of the silhouette width criterion for cluster analysis, Fuzzy Sets and Systems, 157, 2858-2875, 10.1016/j.fss.2006.07.006, 2006.
- Fukuyama, Y.: A new method of choosing the number of clusters for the fuzzy c-mean method, Proc. 5th Fuzzy Syst. Symp., 1989, 247-250.
- Kwon, S.-H.: Cluster validity index for fuzzy clustering, Electronics Letters, 34, 2176-2177, 1998.
- Rousseeuw, P. J.: Silhouettes: a graphical aid to the interpretation and validation of cluster analysis, Journal of computational and applied mathematics, 20, 53-65, 1987.
- Xie, X. L. and Beni, G.: A validity measure for fuzzy clustering, IEEE Transactions on Pattern Analysis & Machine Intelligence, 13, 841-847, 1991.
